# 1 **Maximum tree lifespans derived from public-domain dendrochronological data**

2

3 Franco Biondi<sup>1</sup>, David Meko<sup>2</sup>, and Gianluca Piovesan<sup>3</sup>

4

5 <sup>1</sup>DendroLab, Dept. of Natural Resources and Environmental Science, University of Nevada, Reno,  
6 Nevada 89557, USA. ORCID: 0000-0003-0651-104X

7 <sup>2</sup>Laboratory of Tree-Ring Research, University of Arizona, Tucson, Arizona 85721, USA. ORCID:  
8 0000-0002-5171-2724

9 <sup>3</sup>DendrologyLab, Department of Ecological and Biological Sciences (DEB), University of Tuscia,  
10 01100 Viterbo, Italy; ORCID: 0000-0002-3214-0839

11

12 Corresponding author: Franco Biondi ([franco.biondi@gmail.com](mailto:franco.biondi@gmail.com))

13

## 14 **Abstract**

15 The public-domain International Tree-Ring Data Bank (ITRDB) is an under-utilized dataset to  
16 improve existing estimates of global tree longevity. Since dendrochronologists have usually targeted  
17 the oldest trees in a stand, this public-domain resource is bound to offer better estimates of maximum  
18 tree age than those available from randomized plots or grid-based forest inventories. We used the  
19 longest continuous ring-width series of existing ITRDB collections as an index of maximum tree age  
20 for that species and site. Using a total of 3679 collections, we obtained longevity estimates for 236  
21 unique tree species, 156 conifers and 80 angiosperms, distributed all over the world. More than half of  
22 the species (167) were represented by no more than 10 collections, and a similar number of species  
23 (144) reached longevity greater than 300 years. Maximum tree ages exceeded 1000 years for several  
24 species (22), all of them conifers, while angiosperm longevity peaked around 500 years. As new

25 collections are constantly being added to the ITRDB, estimates of tree longevity may change slightly,  
26 mainly by adding new species to the database. Given the current emphasis on identifying human-  
27 induced impacts on global systems, detailed analyses of ITRDB holdings provide one of the most  
28 reliable sources of information for tree longevity as an ecological trait.

29

30 **Keywords:** tree longevity, ITRDB, trait database, cambial age, life history.

31 **Key Message:** Baseline information on tree longevity was derived from the most extensive  
32 dendrochronological database currently available. The resulting summary provides a reference point,  
33 to be used for modeling and research purposes.

34 **Acknowledgments:** We are grateful to the Contributors of the International Tree-Ring Data Bank,  
35 and to the agencies and institutions that have allowed the establishment and maintenance of this  
36 exceptional, publicly available resource.

## 37 **Introduction**

38

39 Tree longevity is an essential ecological trait for understanding forest vegetation dynamics (Gutsell  
40 and Johnson 2002), climatic impacts on woody species (Locosselli et al. 2020), and terrestrial carbon  
41 cycling (Körner 2017). While there is no research program specifically designed to investigate tree  
42 longevity, all research efforts aimed at predicting the fate of terrestrial ecosystems depend, more or  
43 less explicitly, on understanding and quantifying demographic patterns and traits, which include  
44 maximum tree lifespans. The emphasis currently being placed on modeling the future response of  
45 forest stands to climatic changes (especially atmospheric warming) and disturbance events (from  
46 droughts to wildfires) has prompted researchers to investigate resilience and resistance of woody  
47 species (e.g., Hessburg et al. 2019; Vitasse et al. 2019). In this context, as tree mortality is  
48 complementary to tree longevity (Das et al. 2016), baseline information on maximum tree age  
49 provides an index whose variability in time and space can reveal environmental and human impacts  
50 on forest species (Xu and Liu 2021).

51 For our purposes, tree age is defined as stem (or trunk) age, which is the cumulative duration  
52 of secondary growth since pith formation at a specified height from the ground (Piovesan and Biondi  
53 2021). Using this definition, tree longevity can be determined for wood-forming species, either clonal  
54 or non-clonal, by means of dendrochronological methods, radiocarbon dating, or a combination of  
55 both (e.g., Piovesan et al. 2018). Dendrochronological work has been traditionally focused on the  
56 oldest individuals of a species, but existing tree-ring data has rarely been analyzed in terms of potential  
57 maximum lifespans. For instance, Zhao et al. (2019) reviewed in detail the International Tree-Ring  
58 Data Bank (ITRDB) and quantified its holdings in terms of species representation, spatial distribution,  
59 and potential improvements for macroecological research purposes, yet they did not address the  
60 issues connected with maximum tree lifespans.

61 Our objective was therefore to investigate tree longevity using the information contained in  
62 the holdings of the ITRDB, which are publicly available but are not yet searchable for demographic  
63 information. We present in this short communication the results of our analysis as a contribution to  
64 existing trait databases. An in-depth analysis of this information in terms of its significance for tree  
65 eco-physiology and evolutionary ecology is ongoing, and will be the subject of future publications.

66

## 67 **Materials and Methods**

68

69 Ring-width data were obtained from the public-domain ITRDB repository in mid-March 2022. To  
70 enhance replication, we did not introduce any additional information besides what was available on  
71 the ITRDB ftp server (<ftp.ncdc.noaa.gov/pub/data/paleo/treering>). The four-letter codes that are  
72 traditionally based on the first two letters of the scientific (Latin) genus and species names (binomial  
73 nomenclature) were compared with their original meanings (Grissino-Mayer 1993).

74 The maximum length of all samples included in a collection was used to estimate tree  
75 longevity. To evaluate how reliable this index was, we compared it with a more refined estimate of  
76 longevity that was based on first grouping individual samples by tree code. This analysis was  
77 performed on a subset of the data, including 519 collections from Canada, Africa, and the Updates  
78 subdirectory. The maximum number of tree rings in a continuous sample exactly matched the tree-  
79 based estimate in most cases, with differences only in 64 collections, and with only two of them being  
80 greater than 100 years (**Figure S1**).

81 Additional checks were performed on the species name to avoid duplicates, incorrect entries,  
82 and collections where only the genus was given. A final comparison was made between the maximum  
83 sample length of a collection and the difference between the overall first and last year, which is  
84 included in the standard metadata information for each collection. When this difference exceeded the  
85 maximum series length by more than 100 years, we analyzed the collection using the COFECHA

86 software (Grissino-Mayer 2001; Holmes 1983).

87         Summary statistics were calculated for all species as well as for angiosperms (Magnoliophyta)  
88 vs. conifers (Pinophyta), and also for the extra-tropics, defined as the regions with latitude above  
89 30°N or below 30°S. Given that the tropics are in reality between 23.5°S and 23.5°N, other  
90 definitions could have been applied, such as  $\pm 25^\circ$ , but we adopted Locosselli et al. (2020)'s definition  
91 for comparison purposes. In order to quantify the minimum number of sites that are most likely to  
92 generate reliable estimates of tree longevity, we tested the correlation between maximum tree age and  
93 number of ITRDB collections. All numerical analyses were performed using either the R numerical  
94 environment (R Core Team 2020) or the SAS software (Delwiche and Slaughter 2019).

95

## 96 **Results and Discussion**

97

98 Overall a total of 3679 out of 5444 collections could be analyzed, which is a considerably larger  
99 number than previous summaries of ITRDB holdings (e.g., 2624 in Locosselli et al. 2020). The  
100 excluded files were affected either by non-standard data organization, end-of-line and end-of-record  
101 issues that could not be resolved, or both. The most recent ITRDB collection used to identify tree  
102 longevity was made in 2019, and the oldest one in 1978. Many species (76) were only represented by  
103 one collection, more than half of the species (167) were represented by no more than 10 collections,  
104 and a handful of species (7) were represented by more than 100 collections, with Douglas-fir  
105 (*Pseudotsuga menziesii*) being the species with the highest number (311).

106         Longevity estimates were obtained for 236 unique tree species, 156 conifers (3033 collections)  
107 and 80 angiosperms (646 collections), distributed all over the world but with greater density in the  
108 mid- and high-latitudes (**Figure 1** and **Appendix**). Areas with latitude above 30° N or below 30° S  
109 included 194 species, of which 65 were angiosperms (9 in the southern hemisphere) and 129 were  
110 conifers (19 in the southern hemisphere). The majority of species (144) reached longevity greater than

111 300 years, and maximum tree ages exceeded 1000 years for several species (22), all of them conifers,  
112 while angiosperm longevity peaked around 500 years (**Figure 2** and **Table 1**). This very large  
113 taxonomic difference in realized longevity is well known, albeit its causes are still being investigated  
114 (Munné-Bosch 2018; Peñuelas and Munné-Bosch 2010; Piovesan and Biondi 2021). Based on  
115 stochastic modeling of the theoretical relationship between average mortality rate and age structure in  
116 old-growth forests, maximum tree ages of a few centuries in angiosperms and of a few millennia in  
117 conifers are consistent with differences in their average mortality rate (Cannon et al. 2022).  
118  
119  
120

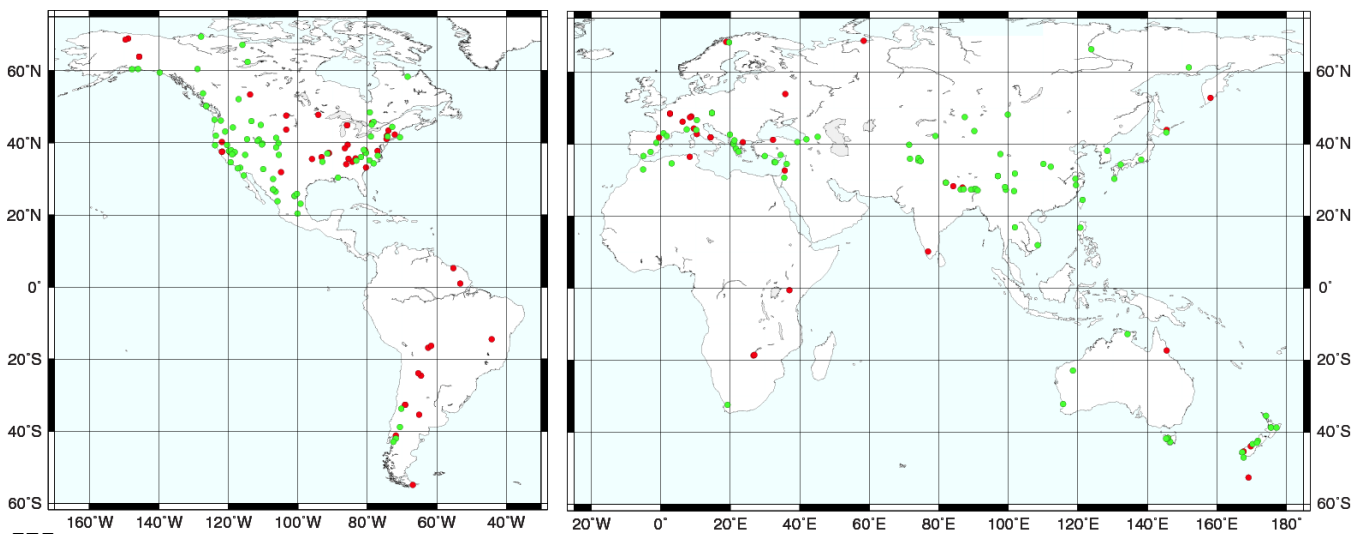

122 **Figure 1.** Map of 236 ITRDB collections (solid dots) that provided the maximum estimated tree age  
123 by species (80 angiosperms: red; 156 conifers: green). Sites cover most of the globe, from the Arctic  
124 ( $69.5^{\circ}\text{N}$ ) to the sub-Antarctic ( $54.9^{\circ}\text{S}$ , Campbell Island), but with higher density in the extra-tropics  
125 (i.e., areas with latitude above  $30^{\circ}\text{N}$  or below  $30^{\circ}\text{S}$ ), which included 194 species.

126

127 **Table 1.** Summary of maximum tree ages estimated from ITRDB collections.

| Taxa        | Species<br>(#) | Sites<br>(#) | Min-Max<br>(yrs) | Mean<br>(yrs) | St.Err.Mean<br>(yrs) | St.Dev.<br>(yrs) | Median<br>(yrs) | IQR <sup>a</sup><br>(yrs) |
|-------------|----------------|--------------|------------------|---------------|----------------------|------------------|-----------------|---------------------------|
| Angiosperms | 80             | 646          | 28-518           | 229           | 15                   | 132              | 194             | 119-331                   |
| Conifers    | 156            | 3033         | 64-3205          | 618           | 40                   | 496              | 504             | 313-770                   |

128 <sup>a</sup>IQR: Inter-Quartile Range (1<sup>st</sup>-3<sup>rd</sup> quartile).

129

130

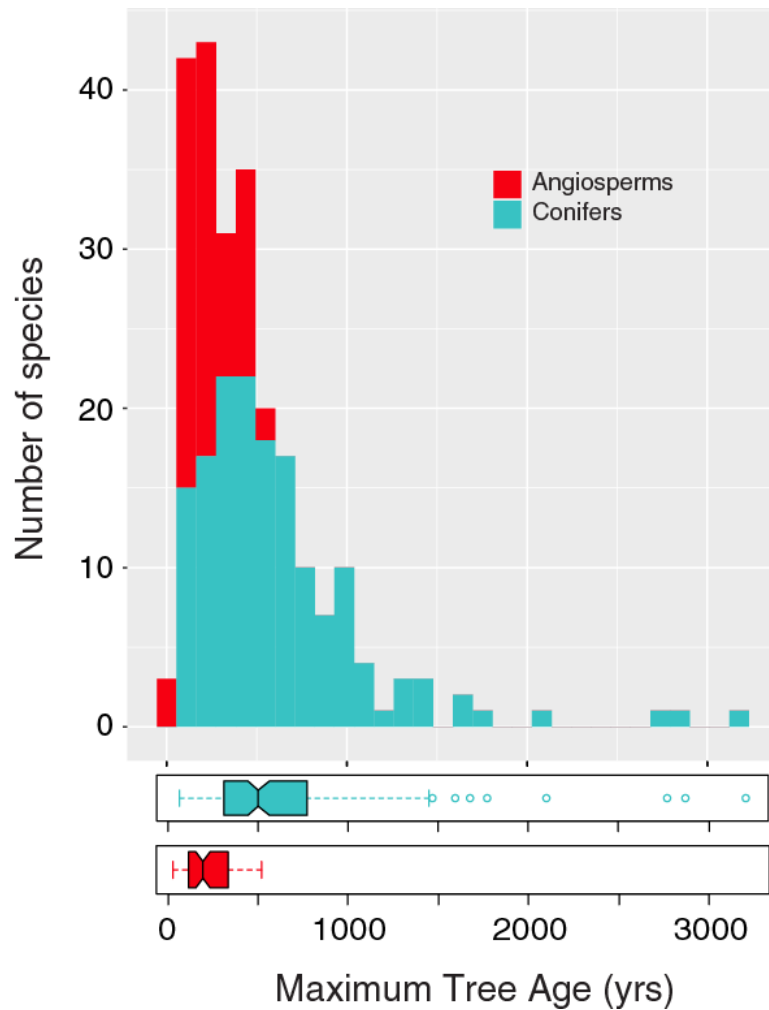

131

132 **Figure 2.** Distribution of tree longevity estimates, showing differences between angiosperms (red bars

133 and boxplot) and conifers (green bars and boxplot).

134           Since dendrochronologists have usually targeted the oldest trees in a stand, the ITRDB public-  
135 domain data are bound to offer better estimates of maximum tree age than those available from  
136 randomized plots, grid-based inventories, or the most complex, state-of-the-art simulation models. As  
137 an example, based on a global analysis of forest inventories and climate data, Besnard et al. (2021)  
138 defined as “old growth” any stand older than 300 years, which is an order of magnitude less than the  
139 maximum tree ages we uncovered. While several large geographic regions were not included in  
140 Besnard et al.’s global analysis (“Africa, Indonesia and Australia were either underrepresented or not  
141 represented”), the authors recognized that even in regions where data were relatively abundant, such  
142 as the US, “unmanaged forests in remote areas were very likely less represented than managed  
143 forests”. The ITRDB data, as shown in our relatively simple analysis, therefore demonstrate that non-  
144 dendrochronological peer-reviewed approaches can severely underestimate tree longevity as an  
145 ecological trait.

146           We also note that there is an over-abundance of popular reports, either in press or on the  
147 internet, that exaggerate the age of the oldest trees, as it becomes clear when only  
148 dendrochronological or radiocarbon-based estimates are considered (Liu et al. 2022; Piovesan and  
149 Biondi 2021). Occasionally these unscientific claims are repeated in the most prestigious scientific  
150 journals, as shown by recent news that oaks older than a millennium can be found in the United  
151 Kingdom and in Fennoscandia (Pennisi 2022; Sonne et al. 2021). Denmark’s King Oak (*Quercus robur*)  
152 is an example of charismatic megaflores, but the notion that it could be “around 1,900 years of age” is  
153 nothing more than myth when confronted with science-based maximum reported ages of  
154 angiosperms in general, and of oaks in particular. Unrealistic tree ages, especially for very large stems,  
155 have often been obtained by assuming a constant growth rate (i.e., a constant ring width), calculated  
156 using only the outermost wood increments, which are typically smaller than the previous ones. Thus,  
157 Nunziata et al. (2022) could proclaim an estimated age of 2000-3000 years for the monumental  
158 chestnut (*Castanea sativa*) named “Castagno dei Cento Cavalli”, possibly favoring the local tourist



159 industry, but not the scientific understanding of tree longevity.

160         Given that not all tree-ring data ever collected are deposited in the ITRDB, we performed an  
161 in-house evaluation of some species' maximum tree ages using collections that we developed but have  
162 not yet been properly archived. Chronologies that have been published in connection with research  
163 projects in the Sierra Nevada (Meko et al. 2014) and the Great Basin (Biondi 2014) of North America  
164 provided estimates that in some cases exceeded the ITRDB ones, but ultimately did not result in large  
165 changes. For instance, single-needle pinyon (*Pinus monophylla*) reached 784 years (ITRDB: 653 yrs; see  
166 Appendix), big-cone Douglas-fir (*Pseudotsuga macrocarpa*) peaked at 683 years (ITRDB: 658 yrs), and  
167 blue oak (*Quercus douglasii*) topped at 539 years (ITRDB: 496 yrs). On the other hand, a large difference  
168 emerged for *Fagus sylvatica* (ITRDB: 407 yrs), which has a tree-ring-based maximum age of 625 yrs  
169 (Piovesan et al. 2019).

170         As new collections are constantly being added to the ITRDB, estimates of tree longevity may  
171 change. The comparison reported in the previous paragraph suggests that these changes may be  
172 relatively small for species that are already represented by several sites. Based on the relationship  
173 between estimated longevity and number of collections (**Figure 3**), ~40 chronologies are needed to  
174 reach reliable estimates. Also, a larger percentage of angiosperm species appeared capable of reaching  
175 the extreme longevity of Magnoliophyta (a few centuries) compared to Pinophyta, since only a  
176 handful of species can attain the conifer maximum ages (a few millennia). Considering the very large  
177 number (3679) of ITRDB collections we analyzed, and that our results included 20% more species for  
178 the extra-tropics than previously reported (161; Locosselli et al. 2020), it is plausible that most changes  
179 in tree longevity estimates derived from tree-ring data will be caused by adding new species to the  
180 ITRDB holdings. Yet, we note that our overall estimated mean longevity of trees in all extra-tropical  
181 biomes was  $516 \pm 34$  yrs, which is significantly higher than the recently published estimate of  $322 \pm$   
182 200 yrs (Locosselli et al. 2020).

183         Despite the advantages of tree-ring records for estimating tree longevity, it is still necessary to

184 point out that the scientifically-based data we have produced on such a fundamental botanical and  
185 ecological trait represent the minimum boundary for a species. In some cases, tree-ring samples may  
186 contain many more rings that are not measured, and are therefore excluded from ITRDB holdings.  
187 Furthermore, dendrochronologists may often avoid measuring sections of increment cores or stem  
188 sections that are too difficult to crossdate, either because of erratic growth patterns, extremely low  
189 growth rates, injuries, branch insertions, rot, or other anatomical imperfections of the wood structure  
190 (Piovesan and Biondi 2021).

191

192

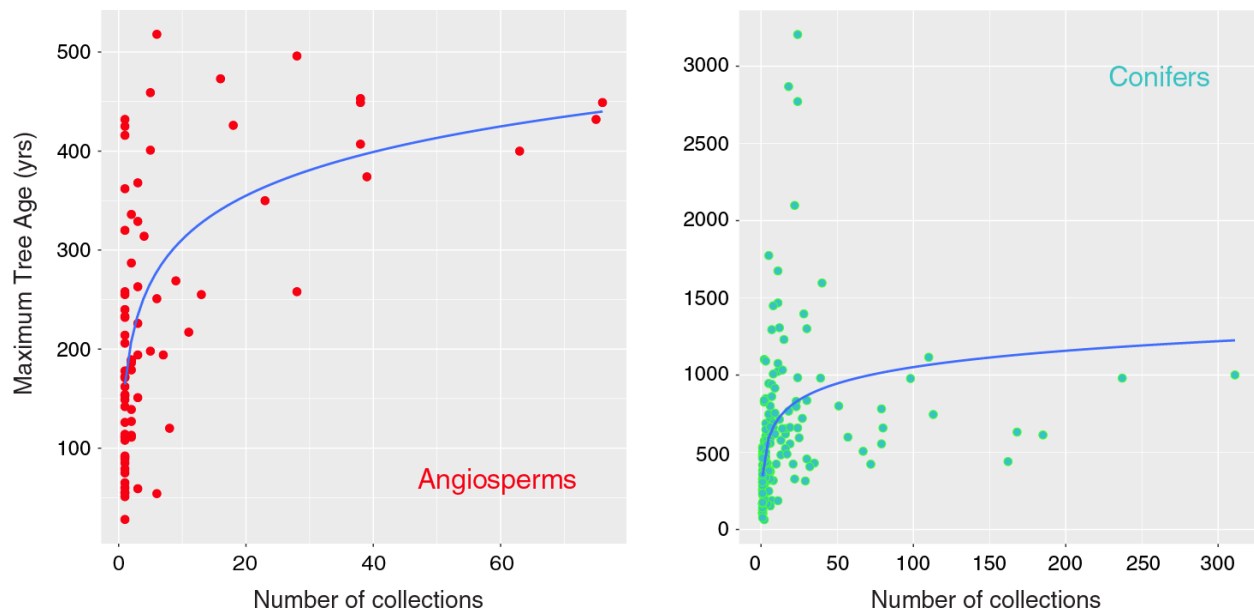

193

194 **Figure 3.** Relationship between the estimated tree longevity (Maximum Tree Age) and the number of  
195 collections for each species (80 angiosperms, 156 conifers).

196

197

198 An additional confounding factor is that, even when tree-ring measurements are archived in  
199 the ITRDB, researchers may not provide the entire datasets. By doing so, investigators can satisfy

200 funding agency requirements for archiving data while at the same time avoiding to share the most  
201 important, i.e. longest-term, information. This issue was noticed in more than one case, but a clear  
202 example was provided by the 37 California chronologies coded as CA561-CA597, which all end in  
203 1990-1991 and start in 1879-1880. Since the collections only cover 111-112 years, but were made on  
204 species (*Abies concolor*, *A. magnifica*, *Calocedrus decurrens*, *Pinus contorta*, *P. jeffreyi*, *P. lambertiana*, *P. ponderosa*,  
205 *Tsuga mertensiana*) and in areas (the Sierra Nevada of the western USA) that are known to yield much  
206 older trees (see Appendix), it is unlikely that all data were archived. One could argue that perhaps the  
207 study was performed in even-aged plantations, or that there were special constraints that forced the  
208 investigators to sample young trees or to extract very short increment cores even when the stem was  
209 large. As it turns out, one of us (FB) actually participated in some of those field collections as a  
210 graduate student, acquiring first-hand knowledge of these stands and of these collections, which were  
211 dendroclimatic-oriented and performed in old-growth stands by targeting the largest trees.

212         When the number of ITRDB collections of the same species is large enough, the above  
213 mentioned issue should not impact the estimated maximum tree age. However, a potentially large  
214 underestimation occurs if data are not fully archived and only a few chronologies are available for a  
215 species. Among the collections coded as CA561-CA597 are indeed the only ITRDB holdings for a  
216 species, *Quercus kelloggii*, whose longevity was therefore estimated at 111 years – an unreliably small  
217 value. Partial submissions may cause other artifacts, for instance connected to changes in tree  
218 longevity over time. While we did not perform an exhaustive analysis of this problem, one can  
219 imagine how the maximum age of tree species included in collections CA561-CA597 could be  
220 compared to the longevity of the same species in earlier collections. As reports of the impending  
221 doom of ancient trees accumulate (Locosselli et al. 2020; McDowell et al. 2020), such a comparison  
222 could then lead to claims of human-induced reduction in tree longevity even without the presence of a  
223 naive observer or one fully vested in promoting an apocalyptic narrative.

224         The definition of ‘old-growth’ stands, which has fundamental implications for conservation

225 efforts and science-based forest management, depends on correctly estimating tree longevity. We  
226 emphasize that what ‘old’ means depends both on the tree species, as shown here, and on its realized  
227 niche, as we have argued elsewhere (Piovesan and Biondi 2021). Using a fixed cutoff, such as the 300  
228 years threshold that is often repeated in the literature (e.g., Besnard et al. 2021), fails to consider  
229 ecoclimatic and taxonomic differences. Earlier, detailed analyses of old-growth conditions had already  
230 pointed out that reported old-growth forest ages can range from 50 to 1,150 years (Wirth et al. 2009),  
231 making it necessary to design new metrics for evaluating old-growth conditions (Di Filippo et al.  
232 2017). Additional submissions of tree-ring data to the ITRDB, and related publications of  
233 dendrochronological and radiocarbon-based information on tree longevity, is bound to improve our  
234 understanding of tree life histories, forest demographics, old-growth features, and of their complex  
235 dependence on multi-scale impacts from natural and human-caused disturbances.

236

## 237 **References**

238

239 Besnard S, Koirala S, Santoro M, Weber U, Nelson J, Gütter J, Hérault B, Kassi J, N'Guessan A,  
240 Neigh C, Poulter B, Zhang T, Carvalhais N (2021) Mapping global forest age from forest  
241 inventories, biomass and climate data. *Earth Syst Sci Data* 13: 4881-4896

242 Biondi F (2014) Dendroclimatic reconstruction at km-scale grid points: A case study from the Great  
243 Basin of north America. *J Hydrometeorol* 15: 891-906

244 Cannon CH, Piovesan G, Munné-Bosch S (2022) Old and ancient trees are life history lottery winners  
245 and vital evolutionary resources for long-term adaptive capacity. *Nat Plants* 8: 136-145

246 Das AJ, Stephenson NL, Davis KP (2016) Why do trees die? Characterizing the drivers of  
247 background tree mortality. *Ecology* 97: 2616-2627

248 Delwiche LD, Slaughter SJ (2019) *The Little SAS Book: A Primer*. SAS Institute Inc., Cary, North  
249 Carolina (USA)

- 250 Di Filippo A, Biondi F, Piovesan G, Ziaco E (2017) Tree ring-based metrics for assessing old-growth  
251 forest naturalness. *Journal of Applied Ecology* 54: 737-749
- 252 Grissino-Mayer HD (1993) An updated list of species used in tree-ring research. *Tree-Ring Bull* 53:  
253 17-43
- 254 Grissino-Mayer HD (2001) Evaluating crossdating accuracy: a manual and tutorial for the computer  
255 program COFECHA. *Tree-Ring Res* 57: 205-221
- 256 Gutsell SL, Johnson EA (2002) Accurately ageing trees and examining their height-growth rates:  
257 implications for interpreting forest dynamics. *J Ecol* 90: 153-166
- 258 Hessburg PF, Miller CL, Parks SA, Povak NA, Taylor AH, Higuera PE, Prichard SJ, North MP,  
259 Collins BM, Hurteau MD, Larson AJ, Allen CD, Stephens SL, Rivera-Huerta H, Stevens-  
260 Rumann CS, Daniels LD, Gedalof Ze, Gray RW, Kane VR, Churchill DJ, Hagemann RK,  
261 Spies TA, Cansler CA, Belote RT, Veblen TT, Battaglia MA, Hoffman C, Skinner CN, Safford  
262 HD, Salter RB (2019) Climate, environment, and disturbance history govern resilience of  
263 western North American forests. *Frontiers in Ecology and Evolution* 7
- 264 Holmes RL (1983) Computer-assisted quality control in tree-ring dating and measurement. *Tree-Ring*  
265 *Bull* 43: 69-78
- 266 Körner C (2017) A matter of tree longevity. *Science* 355: 130-131
- 267 Liu J, Xia S, Zeng D, Liu C, Li Y, Yang W, Yang B, Zhang J, Slik F, Lindenmayer DB (2022) Age and  
268 spatial distribution of the world's oldest trees. *Conservation Biology* 36: art. e13907 (10 pp.)
- 269 Locosselli GM, Brienen RJW, Leite MdS, Gloor M, Krottenthaler S, Oliveira AAd, Barichivich J,  
270 Anhof D, Ceccantini G, Schöngart J, Buckeridge M (2020) Global tree-ring analysis reveals  
271 rapid decrease in tropical tree longevity with temperature. *Proc Nat Acad Sci* 117: 33358-  
272 33364
- 273 McDowell NG, Allen CD, Anderson-Teixeira K, Aukema BH, Bond-Lamberty B, Chini L, Clark JS,  
274 Dietze M, Grossiord C, Hanbury-Brown A, Hurtt GC, Jackson RB, Johnson DJ, Kueppers L,  
275 Lichstein JW, Ogle K, Poulter B, Pugh TAM, Seidl R, Turner MG, Uriarte M, Walker AP, Xu  
276 C (2020) Pervasive shifts in forest dynamics in a changing world. *Science* 368: art. eaaz9463

- 277 Meko DM, Woodhouse CA, Touchan R (2014) Klamath/San Joaquin/Sacramento Hydroclimatic  
278 Reconstructions from Tree Rings. vol Draft Final Report to California Department of Water  
279 Resources. University of Arizona, Tucson, Arizona, USA, p 117
- 280 Munné-Bosch S (2018) Limits to tree growth and longevity. *Trends Plant Sci* 23: 985-993
- 281 Nunziata A, Ferlito F, Magri A, Ferrara E, Petriccione M (2022) The Hundred Horses Chestnut: a  
282 model system for studying mutation rate during clonal propagation in superior plants.  
283 *Forestry: An International Journal of Forest Research* online: art. cpac020 (8 pp.)
- 284 Pennisi E (2022) Rare and ancient trees are key to a healthy forest. *Science*
- 285 Peñuelas J, Munné-Bosch S (2010) Potentially immortal? *New Phytol* 187: 564–567
- 286 Piovesan G, Biondi F (2021) On tree longevity. *New Phytol* 231: 1318-1337
- 287 Piovesan G, Biondi F, Baliva M, De Vivo G, Marchianò V, Schettino A, Di Filippo A (2019) Lessons  
288 from the wild: slow but increasing long-term growth allows for maximum longevity in  
289 European beech. *Ecology* 100: art. e02737 (4 pp.)
- 290 Piovesan G, Biondi F, Baliva M, Presutti Saba E, Calcagnile L, Quarta G, D'Elia M, De Vivo G,  
291 Schettino A, Di Filippo A (2018) The oldest dated tree of Europe lives in the wild Pollino  
292 massif: *Italus*, a strip-bark Heldreich's pine. *Ecology* 99: 1682-1684
- 293 R Core Team (2020) R: A language and environment for statistical computing. vol ISBN 3-900051-  
294 07-0. R Foundation for Statistical Computing, Vienna, Austria
- 295 Sonne C, Xia C, Lam SS (2021) Ancient oaks of Europe are archives — protect them. *Nature* 594
- 296 Vitasse Y, Bottero A, Cailleret M, Bigler C, Fonti P, Gessler A, Lévesque M, Rohner B, Weber P,  
297 Rigling A, Wohlgemuth T (2019) Contrasting resistance and resilience to extreme drought and  
298 late spring frost in five major European tree species. *Glob Change Biol* online
- 299 Wirth C, Messier C, Bergeron Y, Frank D, Fankhänel A (2009) Old-growth forest definitions: A  
300 pragmatic view. In: Wirth C, Gleixner G, Heimann M (eds) *Old-Growth Forests: Function,*  
301 *Fate and Value.* Springer Berlin Heidelberg, Berlin, Heidelberg, pp 11-33

302 Xu C, Liu H (2021) Hydraulic adaptability promotes tree life spans under climate dryness. *Glob Ecol*  
303 *Biogeogr* 31: 51– 61

304 Zhao S, Pederson N, D'Orangeville L, HilleRisLambers J, Boose E, Penone C, Bauer B, Jiang Y,  
305 Manzanedo Rubén D (2019) The International Tree-Ring Data Bank (ITRDB) revisited: Data  
306 availability and global ecological representativity. *J Biogeogr* 46: 355-368

307

## 308 **Statements & Declarations**

### 309 *Funding*

310 This work was supported by the US National Science Foundation (grant AGS-P2C2-1903561 to F.  
311 Biondi). The views and conclusions contained in this document are those of the authors and should  
312 not be interpreted as representing the opinions or policies of the funding agencies and supporting  
313 institutions.

314

### 315 *Competing Interests*

316 The authors have no relevant financial or non-financial interests to disclose.

317

### 318 *Author Contributions*

319 All authors contributed to the study conception and design. Data collection and analysis were  
320 performed by F. Biondi with contributions by D. Meko and G. Piovesan. The first draft of the  
321 manuscript was written by F. Biondi, and all authors commented on previous versions of the  
322 manuscript. All authors read and approved the final manuscript.

323

### 324 *Data Availability*

325 The datasets generated during the current study are available from the corresponding author on  
326 reasonable request.

327 **Figure S1.** Comparison between tree ages estimated using the maximum length of a single continuous  
328 ring-width measurement series (x-axis) and the maximum length of ring-width measurements for a  
329 tree (y-axis), as coded in 519 ITRDB collections from Canada, Africa, and the Updates subdirectory in  
330 March 2022.  
331

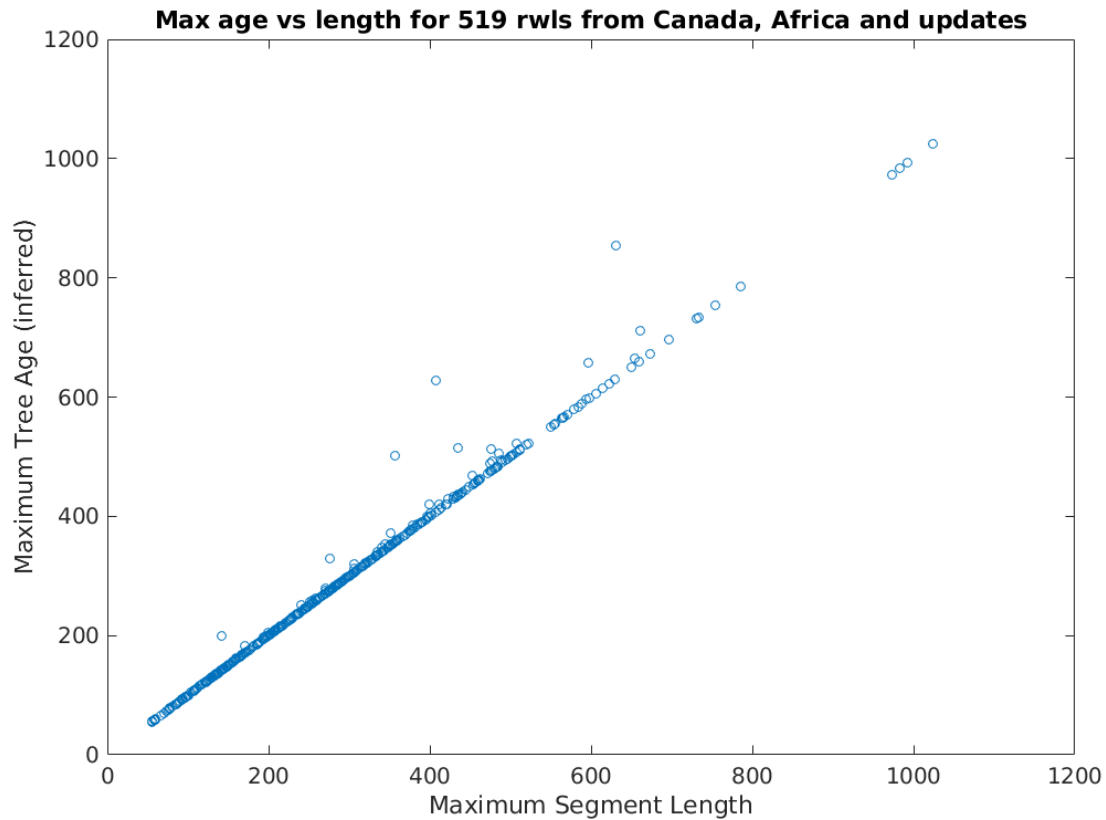

332
